# Supplementary material for: Bioinspired design of amphiphilic particles with tailored compartments for dual-drug controlled release
Source: Royal Society of Chemistry journal article supplement (doi:10.1039/c9tb02540e), 2020-01-01
Supplement: c9tb02540e2.pdf [file c9tb02540e2.pdf]

**Supporting Information**

**Bioinspired design of amphiphilic particles with tailored compartments for dual-drug controlled release**

Juanrong Qin, Zeke Li, Botao Song\*

Key Laboratory of Synthetic and Natural Functional Molecule Chemistry of Ministry of Education, College of Chemistry and Materials Science, Northwest University, Xi'an 710069, Shaanxi, People's Republic of China.

Corresponding author: Botao Song (E-mail : botaosong@nwu.edu.cn)

J. Qin and Z. Li contribute equally to this work.

## 1. Supplementary figures

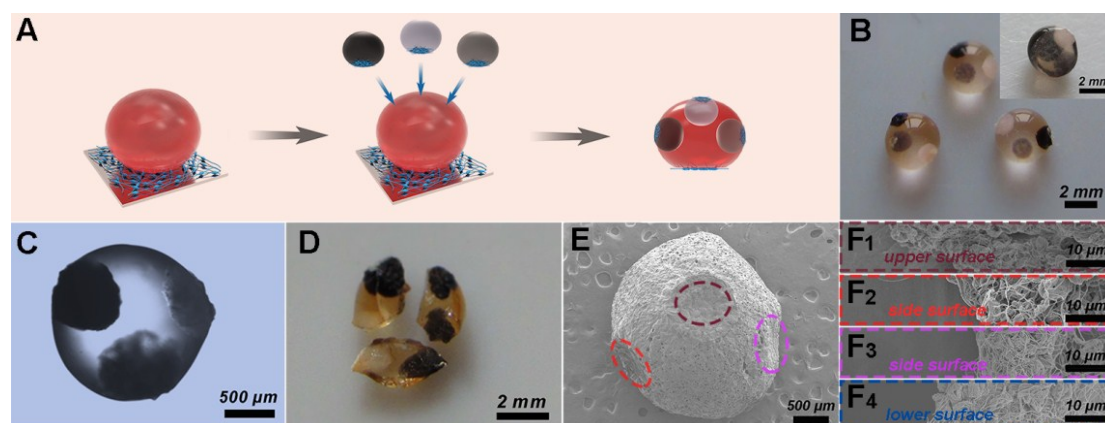

Figure S1. (A) Schematic illustration of the fabrication process for amphiphilic particles with four compartments; (B-F) Digital image, optical image, cross-section image, and SEM images of the four compartmental amphiphilic particles.

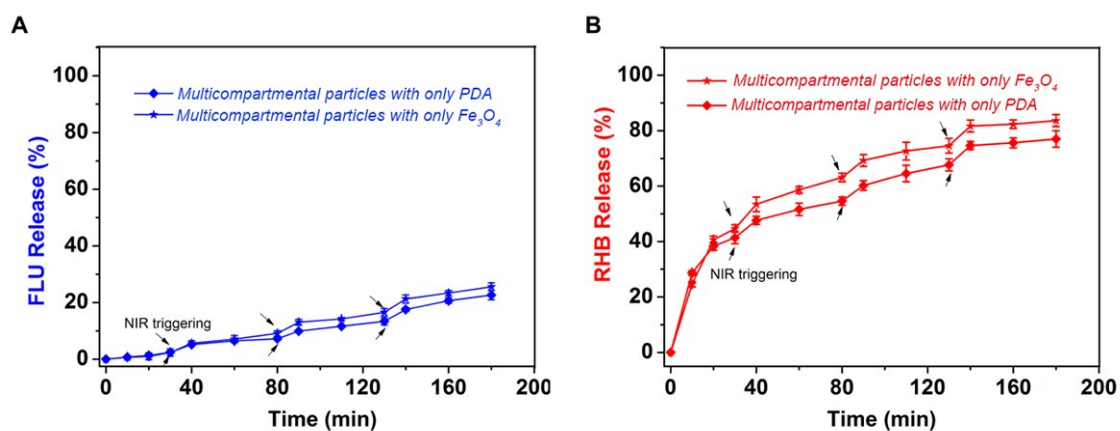

Figure S2. (A) FLU and (B) RHB release profiles of the amphiphilic multicompartamental particles with only magnetic nanoparticles and amphiphilic multicompartamental particles with only PDA nanoparticles.

## 2. Supplementary video

Movie S1. Amphiphilicity induced self-assembly of a black amphiphilic particle into a large-sized amphiphilic particle to achieve a bicompartamental structure.
